# Supplementary material for: YAP1 Exerts Its Transcriptional Control via TEAD-Mediated Activation of Enhancers
Source: PubMed Central journal article supplement (PMC4546604; doi:10.1371/journal.pgen.1005465), 2015-08-21
Supplement: pgen.1005465.s014.pdf [file pgen.1005465.s014.pdf]

| ChIP sample      | Input sample      | Peak calling software | Confident regions threshold | Enriched regions threshold | Peaks (replicates' agreement) |
|------------------|-------------------|-----------------------|-----------------------------|----------------------------|-------------------------------|
| YAP1_SF268_1     | Input_SF268_1     | Peakzilla             | 2680                        | 7659                       | 2498                          |
| YAP1_SF268_2     |                   |                       | 984                         | 3397                       |                               |
| TEAD1_SF268_1    | Input_SF268_2     | Peakzilla             | 2683                        | 8521                       | 2652                          |
| TEAD1_SF268_2    |                   |                       | 2249                        | 7102                       |                               |
| H3K27ac_SF268_1  | Input_SF268_2     | MACS                  | 35517                       | 45205                      | 38331                         |
| H3K27ac_SF268_2  |                   |                       | 37041                       | 46381                      |                               |
| YAP1_NCI-H2052_1 | Input_NCI-H2052_1 | Peakzilla             | 16388                       | 33114                      | 16470                         |
| YAP1_NCI-H2052_2 |                   |                       | 13113                       | 29142                      |                               |
| YAP1_IMR90_1     | Input_IMR90_1     | Peakzilla             | 3553                        | 409                        | 1111                          |
| YAP1_IMR90_2     |                   |                       | 6884                        | 1116                       |                               |

**S1 Table. Peak calling strategy for ChIP-seq datasets.**

For YAP1 and TEAD1 datasets, confident regions were selected using peakzilla with score  $\geq 2$  and fold enrichment over input  $\geq 4$  and enriched regions with score  $\geq 1$  and fold enrichment over input  $\geq 4$ . For H3K27ac datasets, confident regions were selected using MACS with P-value  $\leq 10^{-10}$  and enriched regions with P-value  $\leq 10^{-30}$ . We defined peaks as shared between samples if confident peaks called in one sample are overlapping an enriched region in another sample and reciprocally. This ensures that a peak that is enriched in both replicates but which missed the stringent threshold for peak calling in one of them is not wrongly discarded.
