# Supplementary material for: YAP1 Exerts Its Transcriptional Control via TEAD-Mediated Activation of Enhancers
Source: PubMed Central journal article supplement (PMC4546604; doi:10.1371/journal.pgen.1005465), 2015-08-21
Supplement: pgen.1005465.s016.pdf [file pgen.1005465.s016.pdf]

| 6-mer              | Total number of peaks | Number of peak regions with motif | Number of control peak regions with motif | Percent of peak regions with motif | Enrichment over control | P-value                 |
|--------------------|-----------------------|-----------------------------------|-------------------------------------------|------------------------------------|-------------------------|-------------------------|
| CATTCC preferences | 2498                  | 2152                              | 943                                       | 86.15                              | 2.28                    | $4.36 \times 10^{-289}$ |
| CATTCC             | 2498                  | 1333                              | 206                                       | 53.36                              | 6.47                    | $1.18 \times 10^{-284}$ |
| ACATTC             | 2498                  | 1011                              | 204                                       | 40.47                              | 4.96                    | $1.21 \times 10^{-167}$ |
| ATTCCA             | 2498                  | 1041                              | 263                                       | 41.67                              | 3.96                    | $1.27 \times 10^{-146}$ |
| ATTCCT             | 2498                  | 1042                              | 289                                       | 41.71                              | 3.60                    | $6.39 \times 10^{-135}$ |
| GCATTC             | 2498                  | 823                               | 164                                       | 32.95                              | 5.02                    | $6.97 \times 10^{-131}$ |
| AATTCC             | 2498                  | 707                               | 214                                       | 28.30                              | 3.30                    | $4.31 \times 10^{-76}$  |
| CATTCT             | 2498                  | 727                               | 317                                       | 29.10                              | 2.29                    | $1.10 \times 10^{-47}$  |
| ATTCCC             | 2498                  | 449                               | 179                                       | 17.97                              | 2.51                    | $4.30 \times 10^{-32}$  |
| GATTCC             | 2498                  | 331                               | 118                                       | 13.25                              | 2.80                    | $2.05 \times 10^{-27}$  |
| ATTCCG             | 2498                  | 135                               | 19                                        | 5.40                               | 7.10                    | $1.59 \times 10^{-24}$  |
| TCATTC             | 2498                  | 460                               | 272                                       | 18.41                              | 1.69                    | $1.51 \times 10^{-14}$  |
| CCATTC             | 2498                  | 314                               | 175                                       | 12.57                              | 1.79                    | $9.93 \times 10^{-12}$  |
| CATACC             | 2498                  | 255                               | 131                                       | 10.21                              | 1.95                    | $1.21 \times 10^{-11}$  |
| CATCCC             | 2498                  | 302                               | 170                                       | 12.09                              | 1.78                    | $4.83 \times 10^{-11}$  |
| CCTTCC             | 2498                  | 392                               | 242                                       | 15.69                              | 1.62                    | $5.80 \times 10^{-11}$  |
| CATTCA             | 2498                  | 416                               | 264                                       | 16.65                              | 1.58                    | $1.18 \times 10^{-10}$  |
| CATTTC             | 2498                  | 453                               | 318                                       | 18.13                              | 1.42                    | $4.71 \times 10^{-8}$   |
| CGTTCC             | 2498                  | 71                                | 24                                        | 2.84                               | 2.96                    | $1.86 \times 10^{-7}$   |
| CATTGC             | 2498                  | 280                               | 184                                       | 11.21                              | 1.52                    | $1.05 \times 10^{-6}$   |
| CATGCC             | 2498                  | 389                               | 284                                       | 15.57                              | 1.37                    | $5.41 \times 10^{-6}$   |
| CAGTCC             | 2498                  | 206                               | 139                                       | 8.25                               | 1.48                    | $7.09 \times 10^{-5}$   |
| CTTTCC             | 2498                  | 353                               | 276                                       | 14.13                              | 1.28                    | $4.34 \times 10^{-4}$   |
| CATTCCG            | 2498                  | 53                                | 26                                        | 2.12                               | 2.04                    | $6.72 \times 10^{-4}$   |
| CATTAC             | 2498                  | 150                               | 144                                       | 6.00                               | 1.04                    | 0.34                    |
| CAATCC             | 2498                  | 131                               | 133                                       | 5.24                               | 0.98                    | 0.52                    |
| CACTCC             | 2498                  | 265                               | 275                                       | 10.61                              | 0.96                    | 0.66                    |
| TATTCC             | 2498                  | 165                               | 228                                       | 6.60                               | 0.72                    | 0.99                    |

**S3 Table. TEAD motif preferences.**

The CATTCC motif preferences (first line) were calculated with the occurrences of the CATTCC 6-mers allowing for one mismatch to CATTCC using only the 6-mers that were present in at least 20% of the peaks and two fold enriched over control peaks (seven 6-mers in the second section).
