# Supplementary material for: YAP1 Exerts Its Transcriptional Control via TEAD-Mediated Activation of Enhancers
Source: PubMed Central journal article supplement (PMC4546604; doi:10.1371/journal.pgen.1005465), 2015-08-21
Supplement: pgen.1005465.s017.pdf [file pgen.1005465.s017.pdf]

| Motif           | Total number of peaks | Number of peak regions with motif | Number of control peak regions with motif | Number of summit regions with motif | Number of flanking regions with motif | Percent of peak regions with motif | Enrichment over control regions | Enrichment at summit over flanking regions | P-value (over control)  |
|-----------------|-----------------------|-----------------------------------|-------------------------------------------|-------------------------------------|---------------------------------------|------------------------------------|---------------------------------|--------------------------------------------|-------------------------|
| Jolma_TEAD4_1   | 2498                  | 2069                              | 630                                       | 1797                                | 982                                   | 82.83                              | 3.28                            | 1.83                                       | 0                       |
| Jolma_TEAD1_1   | 2498                  | 1931                              | 499                                       | 1647                                | 867                                   | 77.30                              | 3.87                            | 1.90                                       | 0                       |
| MA0090_1_TEAD1  | 2498                  | 1954                              | 814                                       | 1666                                | 1015                                  | 78.22                              | 2.40                            | 1.64                                       | 5.46×10 <sup>-241</sup> |
| Jolma_TEAD3_1   | 2498                  | 1740                              | 735                                       | 1531                                | 811                                   | 69.66                              | 2.37                            | 1.89                                       | 1.21×10 <sup>-183</sup> |
| Jolma_JDP2_1    | 2498                  | 1072                              | 342                                       | 758                                 | 537                                   | 42.91                              | 3.13                            | 1.41                                       | 2.76×10 <sup>-121</sup> |
| MA0099_2_AP1    | 2498                  | 1100                              | 424                                       | 749                                 | 554                                   | 44.03                              | 2.59                            | 1.35                                       | 6.16×10 <sup>-99</sup>  |
| Jolma_NFE2_1    | 2498                  | 1119                              | 478                                       | 787                                 | 592                                   | 44.80                              | 2.34                            | 1.33                                       | 1.45×10 <sup>-86</sup>  |
| MA0003_1_TFAP2A | 2498                  | 888                               | 356                                       | 530                                 | 570                                   | 35.55                              | 2.49                            | 0.93                                       | 4.27×10 <sup>-70</sup>  |
| Jolma_TFAP2A_1  | 2498                  | 912                               | 379                                       | 565                                 | 600                                   | 36.51                              | 2.41                            | 0.94                                       | 1.44×10 <sup>-68</sup>  |
| MA0107_1_RELA   | 2498                  | 1071                              | 544                                       | 727                                 | 583                                   | 42.87                              | 1.97                            | 1.25                                       | 1.72×10 <sup>-58</sup>  |
| Jolma_TFAP2B_1  | 2498                  | 944                               | 441                                       | 580                                 | 622                                   | 37.79                              | 2.14                            | 0.93                                       | 2.07×10 <sup>-58</sup>  |
| Jolma_Tcfap2a_1 | 2498                  | 879                               | 395                                       | 539                                 | 569                                   | 35.19                              | 2.22                            | 0.95                                       | 3.29×10 <sup>-57</sup>  |
| Jolma_TFAP2C_1  | 2498                  | 941                               | 459                                       | 580                                 | 620                                   | 37.67                              | 2.05                            | 0.93                                       | 2.23×10 <sup>-53</sup>  |
| Jolma_EBF1_1    | 2498                  | 935                               | 457                                       | 596                                 | 576                                   | 37.43                              | 2.05                            | 1.03                                       | 1.05×10 <sup>-52</sup>  |
| MA0056_1_MZF1   | 2498                  | 1075                              | 573                                       | 615                                 | 672                                   | 43.03                              | 1.88                            | 0.91                                       | 1.18×10 <sup>-52</sup>  |
| MA0144_1_Stat3  | 2498                  | 1226                              | 728                                       | 853                                 | 653                                   | 49.08                              | 1.68                            | 1.31                                       | 4.01×10 <sup>-48</sup>  |
| MA0081_1_SPIB   | 2498                  | 987                               | 525                                       | 622                                 | 527                                   | 39.51                              | 1.88                            | 1.18                                       | 5.72×10 <sup>-47</sup>  |
| MA0154_1_EBF1   | 2498                  | 1227                              | 747                                       | 776                                 | 751                                   | 49.12                              | 1.64                            | 1.03                                       | 1.12×10 <sup>-44</sup>  |
| MA0150_1_NFE2L2 | 2498                  | 954                               | 517                                       | 595                                 | 578                                   | 38.19                              | 1.84                            | 1.03                                       | 7.29×10 <sup>-43</sup>  |
| MA0067_1_Pax2   | 2498                  | 868                               | 450                                       | 555                                 | 473                                   | 34.75                              | 1.93                            | 1.17                                       | 4.46×10 <sup>-42</sup>  |
| MA0105_1_NFKB1  | 2498                  | 909                               | 488                                       | 559                                 | 583                                   | 36.39                              | 1.86                            | 0.96                                       | 3.86×10 <sup>-41</sup>  |
| MA0002_2_RUNX1  | 2498                  | 1171                              | 717                                       | 766                                 | 749                                   | 46.88                              | 1.63                            | 1.02                                       | 8.17×10 <sup>-41</sup>  |
| Jolma_Zic3_1    | 2498                  | 1041                              | 604                                       | 691                                 | 712                                   | 41.67                              | 1.72                            | 0.97                                       | 2.39×10 <sup>-40</sup>  |
| Jolma_Egr1_1    | 2498                  | 1100                              | 658                                       | 703                                 | 766                                   | 44.03                              | 1.67                            | 0.92                                       | 5.95×10 <sup>-40</sup>  |
| Jolma_ZNF740_1  | 2498                  | 990                               | 573                                       | 619                                 | 665                                   | 39.63                              | 1.73                            | 0.93                                       | 6.93×10 <sup>-38</sup>  |
| MA0155_1_INSM1  | 2498                  | 1170                              | 736                                       | 736                                 | 784                                   | 46.84                              | 1.59                            | 0.94                                       | 2.54×10 <sup>-37</sup>  |
| Jolma_ZIC4_1    | 2498                  | 991                               | 578                                       | 646                                 | 677                                   | 39.67                              | 1.71                            | 0.95                                       | 4.04×10 <sup>-37</sup>  |
| Jolma_Zfp740_1  | 2498                  | 1055                              | 642                                       | 665                                 | 707                                   | 42.23                              | 1.64                            | 0.94                                       | 1.10×10 <sup>-35</sup>  |
| Jolma_NFIX_1    | 2498                  | 892                               | 503                                       | 553                                 | 589                                   | 35.71                              | 1.77                            | 0.94                                       | 2.11×10 <sup>-35</sup>  |
| Jolma_ZIC1_1    | 2498                  | 965                               | 569                                       | 615                                 | 656                                   | 38.63                              | 1.70                            | 0.94                                       | 1.09×10 <sup>-34</sup>  |
| Jolma_EGR1_1    | 2498                  | 839                               | 468                                       | 513                                 | 558                                   | 33.59                              | 1.79                            | 0.92                                       | 1.12×10 <sup>-33</sup>  |
| Jolma_NFIB_1    | 2498                  | 867                               | 512                                       | 526                                 | 568                                   | 34.71                              | 1.69                            | 0.93                                       | 5.50×10 <sup>-30</sup>  |
| Jolma_NFIA_1    | 2498                  | 873                               | 523                                       | 537                                 | 573                                   | 34.95                              | 1.67                            | 0.94                                       | 5.49×10 <sup>-29</sup>  |
| Jolma_ELK4_1    | 2498                  | 566                               | 276                                       | 352                                 | 305                                   | 22.66                              | 2.05                            | 1.15                                       | 6.76×10 <sup>-29</sup>  |
| Jolma_EGR4_1    | 2498                  | 926                               | 570                                       | 585                                 | 625                                   | 37.07                              | 1.62                            | 0.94                                       | 9.01×10 <sup>-29</sup>  |
| Jolma_EGR3_1    | 2498                  | 931                               | 579                                       | 585                                 | 644                                   | 37.27                              | 1.61                            | 0.91                                       | 5.00×10 <sup>-28</sup>  |
| Jolma_GLIS2_1   | 2498                  | 1089                              | 721                                       | 706                                 | 751                                   | 43.59                              | 1.51                            | 0.94                                       | 6.45×10 <sup>-28</sup>  |
| Jolma_ELK1_1    | 2498                  | 622                               | 325                                       | 384                                 | 341                                   | 24.90                              | 1.91                            | 1.13                                       | 1.22×10 <sup>-27</sup>  |
| Jolma_RUNX3_1   | 2498                  | 831                               | 498                                       | 543                                 | 518                                   | 33.27                              | 1.67                            | 1.05                                       | 3.38×10 <sup>-27</sup>  |
| MA0061_1_NF-kB  | 2498                  | 902                               | 559                                       | 518                                 | 559                                   | 36.11                              | 1.61                            | 0.93                                       | 3.41×10 <sup>-27</sup>  |
| MA0161_1_NFIC   | 2498                  | 950                               | 603                                       | 587                                 | 527                                   | 38.03                              | 1.57                            | 1.11                                       | 6.94×10 <sup>-27</sup>  |
| MA0101_1_REL    | 2498                  | 981                               | 636                                       | 649                                 | 525                                   | 39.27                              | 1.54                            | 1.24                                       | 4.67×10 <sup>-26</sup>  |
| Jolma_GCM2_1    | 2498                  | 688                               | 386                                       | 442                                 | 392                                   | 27.54                              | 1.78                            | 1.13                                       | 4.72×10 <sup>-26</sup>  |
| MA0014_1_Pax5   | 2498                  | 862                               | 534                                       | 554                                 | 600                                   | 34.51                              | 1.61                            | 0.92                                       | 1.11×10 <sup>-25</sup>  |
| MA0062_2_GABPA  | 2498                  | 879                               | 549                                       | 534                                 | 525                                   | 35.19                              | 1.60                            | 1.02                                       | 1.23×10 <sup>-25</sup>  |

|                   |      |      |     |     |     |       |      |      |                        |
|-------------------|------|------|-----|-----|-----|-------|------|------|------------------------|
| MA0156_1_FEV      | 2498 | 861  | 536 | 520 | 470 | 34.47 | 1.61 | 1.11 | $3.10 \times 10^{-25}$ |
| Jolma_ELF1_1      | 2498 | 863  | 540 | 562 | 498 | 34.55 | 1.60 | 1.13 | $6.92 \times 10^{-25}$ |
| Jolma_SP8_1       | 2498 | 1017 | 678 | 614 | 694 | 40.71 | 1.5  | 0.88 | $1.15 \times 10^{-24}$ |
| Jolma_ERF_1       | 2498 | 676  | 388 | 410 | 399 | 27.06 | 1.74 | 1.03 | $5.24 \times 10^{-24}$ |
| Jolma_RUNX2_1     | 2498 | 765  | 462 | 481 | 494 | 30.62 | 1.66 | 0.97 | $5.50 \times 10^{-24}$ |
| Jolma_Egr3_1      | 2498 | 762  | 460 | 466 | 494 | 30.50 | 1.66 | 0.94 | $6.67 \times 10^{-24}$ |
| Jolma_Elk3_1      | 2498 | 458  | 223 | 272 | 252 | 18.33 | 2.05 | 1.08 | $4.69 \times 10^{-23}$ |
| Jolma_FEV_1       | 2498 | 530  | 278 | 323 | 286 | 21.22 | 1.91 | 1.13 | $6.21 \times 10^{-23}$ |
| Jolma_ETV4_1      | 2498 | 673  | 401 | 410 | 373 | 26.94 | 1.68 | 1.10 | $1.81 \times 10^{-21}$ |
| Jolma_ETV5_1      | 2498 | 289  | 113 | 168 | 159 | 11.57 | 2.56 | 1.06 | $4.30 \times 10^{-21}$ |
| Jolma_KLF13_1     | 2498 | 879  | 584 | 546 | 573 | 35.19 | 1.50 | 0.95 | $1.40 \times 10^{-20}$ |
| Jolma_ELF4_1      | 2498 | 708  | 438 | 430 | 411 | 28.34 | 1.62 | 1.05 | $2.77 \times 10^{-20}$ |
| Jolma_ETV1_1      | 2498 | 449  | 231 | 261 | 249 | 17.97 | 1.94 | 1.05 | $4.30 \times 10^{-20}$ |
| Jolma_ELK3_1      | 2498 | 623  | 371 | 385 | 339 | 24.94 | 1.68 | 1.14 | $1.07 \times 10^{-19}$ |
| Jolma_FLI1_1      | 2498 | 741  | 471 | 451 | 429 | 29.66 | 1.57 | 1.05 | $1.43 \times 10^{-19}$ |
| Jolma_ERG_1       | 2498 | 657  | 402 | 398 | 368 | 26.30 | 1.63 | 1.08 | $2.88 \times 10^{-19}$ |
| Jolma_EGR2_1      | 2498 | 563  | 329 | 340 | 339 | 22.54 | 1.71 | 1.00 | $1.35 \times 10^{-18}$ |
| Jolma_GABPA_1     | 2498 | 500  | 282 | 304 | 268 | 20.02 | 1.77 | 1.13 | $4.95 \times 10^{-18}$ |
| Jolma_MAX_1       | 2498 | 503  | 285 | 321 | 310 | 20.14 | 1.76 | 1.03 | $6.27 \times 10^{-18}$ |
| Jolma_PAX9_1      | 2498 | 556  | 333 | 330 | 346 | 22.26 | 1.67 | 0.95 | $4.30 \times 10^{-17}$ |
| Jolma_Mlx_1       | 2498 | 271  | 121 | 159 | 149 | 10.85 | 2.24 | 1.07 | $4.53 \times 10^{-16}$ |
| Jolma_NRL_1       | 2498 | 588  | 375 | 329 | 352 | 23.54 | 1.57 | 0.93 | $6.74 \times 10^{-15}$ |
| MA0076_1_ELK4     | 2498 | 486  | 296 | 292 | 258 | 19.46 | 1.64 | 1.13 | $4.06 \times 10^{-14}$ |
| MA0093_1_USF1     | 2498 | 490  | 304 | 296 | 251 | 19.62 | 1.61 | 1.18 | $1.87 \times 10^{-13}$ |
| Jolma_PAX1_1      | 2498 | 551  | 362 | 346 | 322 | 22.06 | 1.52 | 1.07 | $1.52 \times 10^{-12}$ |
| Jolma_HINFP1_1    | 2498 | 398  | 237 | 228 | 251 | 15.93 | 1.68 | 0.91 | $2.36 \times 10^{-12}$ |
| Jolma_ETV3_1      | 2498 | 467  | 301 | 270 | 263 | 18.69 | 1.55 | 1.03 | $2.48 \times 10^{-11}$ |
| Jolma_SPDEF_1     | 2498 | 440  | 287 | 250 | 248 | 17.61 | 1.53 | 1.01 | $2.85 \times 10^{-10}$ |
| Jolma_NRF1_1      | 2498 | 452  | 298 | 277 | 250 | 18.09 | 1.52 | 1.10 | $3.69 \times 10^{-10}$ |
| Jolma_TP63_1      | 2498 | 382  | 240 | 217 | 242 | 15.29 | 1.59 | 0.90 | $3.84 \times 10^{-10}$ |
| Jolma_XBP1_1      | 2498 | 261  | 165 | 133 | 154 | 10.45 | 1.58 | 0.86 | $4.05 \times 10^{-07}$ |
| MA0006_1_Arnt_Ahr | 2498 | 308  | 204 | 189 | 142 | 12.33 | 1.51 | 1.33 | $4.48 \times 10^{-07}$ |
| MA0100_1_Myb      | 2498 | 220  | 137 | 124 | 115 | 8.81  | 1.61 | 1.08 | $1.80 \times 10^{-06}$ |
| MA0004_1_Arnt     | 2498 | 218  | 136 | 121 | 111 | 8.73  | 1.60 | 1.09 | $2.16 \times 10^{-06}$ |

#### S4 Table. Known motifs enriched in YAP1/TEAD1 peak regions.

Motifs shown are at least 1.5 fold enriched in YAP1/TEAD1 peak regions compared to control regions and are ranked by P-value (hypergeometric). Colors indicate gene expression levels (FPKM: fragments per kilobase of transcript per million mapped reads) (dark grey FPKM  $\geq 10$ ; light grey FPKM  $\geq 1$ ; white FPKM  $< 1$ ).
