# Supplementary material for: YAP1 Exerts Its Transcriptional Control via TEAD-Mediated Activation of Enhancers
Source: PubMed Central journal article supplement (PMC4546604; doi:10.1371/journal.pgen.1005465), 2015-08-21
Supplement: pgen.1005465.s018.pdf [file pgen.1005465.s018.pdf]

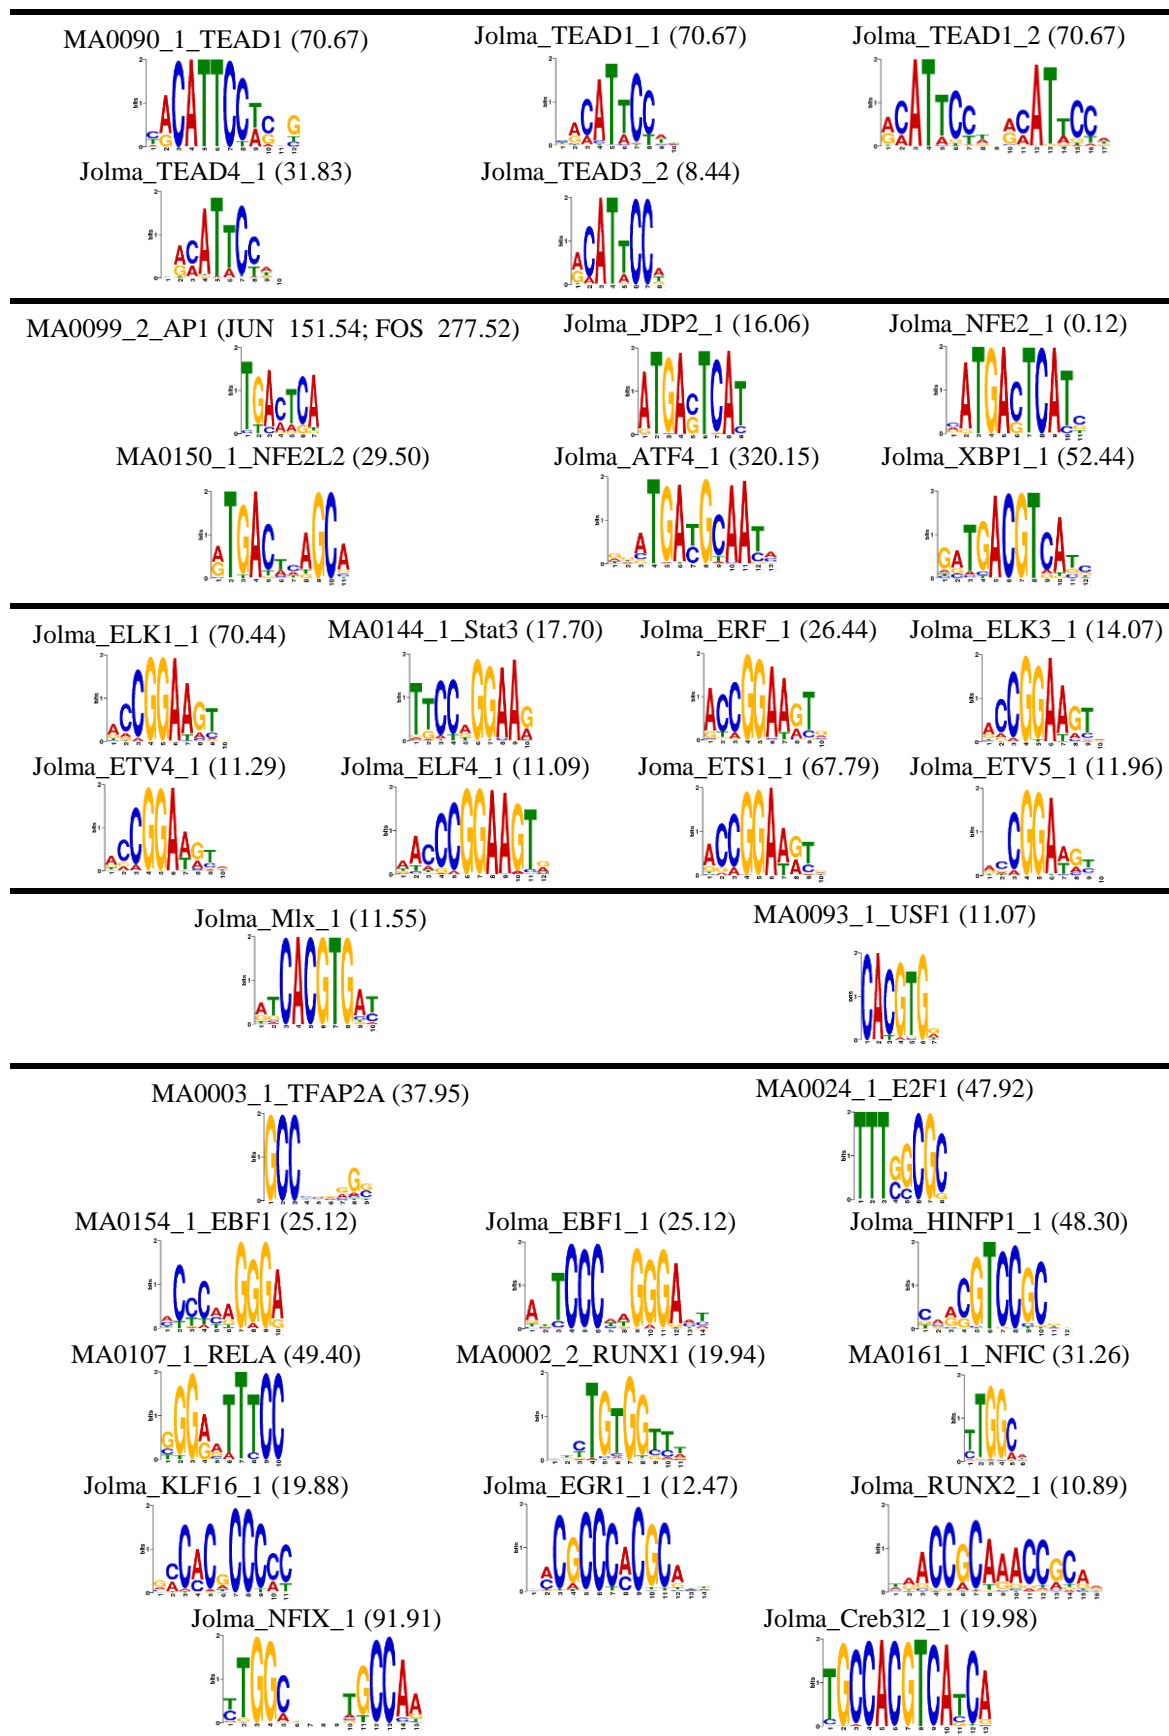

**S5 Table. Enriched motif logos.**

Logos from motifs in **S4 Table** with corresponding gene expression level (FPKM).
