# Supplementary material for: YAP1 Exerts Its Transcriptional Control via TEAD-Mediated Activation of Enhancers
Source: PubMed Central journal article supplement (PMC4546604; doi:10.1371/journal.pgen.1005465), 2015-08-21
Supplement: pgen.1005465.s020.pdf [file pgen.1005465.s020.pdf]

|         |          |         |         |         |
|---------|----------|---------|---------|---------|
| ADAMTS5 | ADRB2    | ANKRD1  | ATAD2   | BMP4    |
| C4BPB   | CDC6     | CDK6    | CITED2  | CTGF    |
| CYR61   | DLC1     | DUSP4   | EFNB2   | FGF2    |
| FRMD6   | FST      | FZD1    | GADD45A | GADD45B |
| GBX2    | HAPLN1   | HAS2    | IGFBP3  | INHBA   |
| IRS1    | KISS1    | LHX4    | MAFF    | MAMDC2  |
| MOK     | NOG      | NPPB    | PHTF2   | PLEKHA7 |
| PLEKHG7 | PRICKLE1 | PTPRQ   | SDPR    | SERTAD4 |
| SH2D4A  | SHISA9   | SLFN12  | ST3GAL1 | TEAD1   |
| TLL1    | TRAM2    | TRPC6   | VGLL2   | VSTM1   |
| ZFP28   | ZFP30    | ZFP82   | ZNF138  | ZNF345  |
| ZNF383  | ZNF431   | ZNF461  | ZNF529  | ZNF540  |
| ZNF566  | ZNF675   | ZNF699  | ZNF716  | ZNF720  |
| ZNF729  | ZNF790   | ZNF804A | ZNF90   | ZNF92   |

**S7 Table. YAP1-target genes in SF268 cells.**

List of genes which were down-regulated upon siRNA-mediated depletion of YAP1 and which are associated to YAP1/TEAD1 binding sites in SF268 cells.
